# Supplementary material for: Interventions for cold homes: a rapid review of the health impacts
Source: PubMed Central journal article supplement (PMC11293810; doi:10.1093/eurpub/ckae058), 2024-04-08
Supplement: ckae058_supplementary_data.pdf [file ckae058_supplementary_data.pdf]

## Supplementary Files

### Supplementary File 1. PRISMA checklist

| Section and Topic             | Item # | Checklist item                                                                                                                                                                                                                                                                                       | Location where item is reported |
|-------------------------------|--------|------------------------------------------------------------------------------------------------------------------------------------------------------------------------------------------------------------------------------------------------------------------------------------------------------|---------------------------------|
| <b>TITLE</b>                  |        |                                                                                                                                                                                                                                                                                                      |                                 |
| Title                         | 1      | Identify the report as a systematic review.                                                                                                                                                                                                                                                          | Page 1                          |
| <b>ABSTRACT</b>               |        |                                                                                                                                                                                                                                                                                                      |                                 |
| Abstract                      | 2      | See the PRISMA 2020 for Abstracts checklist.                                                                                                                                                                                                                                                         | Page 2                          |
| <b>INTRODUCTION</b>           |        |                                                                                                                                                                                                                                                                                                      |                                 |
| Rationale                     | 3      | Describe the rationale for the review in the context of existing knowledge.                                                                                                                                                                                                                          | Page 3                          |
| Objectives                    | 4      | Provide an explicit statement of the objective(s) or question(s) the review addresses.                                                                                                                                                                                                               | Page 3                          |
| <b>METHODS</b>                |        |                                                                                                                                                                                                                                                                                                      |                                 |
| Eligibility criteria          | 5      | Specify the inclusion and exclusion criteria for the review and how studies were grouped for the syntheses.                                                                                                                                                                                          | Page 4 and Table 1              |
| Information sources           | 6      | Specify all databases, registers, websites, organisations, reference lists and other sources searched or consulted to identify studies. Specify the date when each source was last searched or consulted.                                                                                            | Page 4                          |
| Search strategy               | 7      | Present the full search strategies for all databases, registers and websites, including any filters and limits used.                                                                                                                                                                                 | Supplementary File 2            |
| Selection process             | 8      | Specify the methods used to decide whether a study met the inclusion criteria of the review, including how many reviewers screened each record and each report retrieved, whether they worked independently, and if applicable, details of automation tools used in the process.                     | Pages 4 to 5                    |
| Data collection process       | 9      | Specify the methods used to collect data from reports, including how many reviewers collected data from each report, whether they worked independently, any processes for obtaining or confirming data from study investigators, and if applicable, details of automation tools used in the process. | Page 5                          |
| Data items                    | 10a    | List and define all outcomes for which data were sought. Specify whether all results that were compatible with each outcome domain in each study were sought (e.g. for all measures, time points, analyses), and if not, the methods used to decide which results to collect.                        | Page 5                          |
|                               | 10b    | List and define all other variables for which data were sought (e.g. participant and intervention characteristics, funding sources). Describe any assumptions made about any missing or unclear information.                                                                                         | Page 5 and Table 2              |
| Study risk of bias assessment | 11     | Specify the methods used to assess risk of bias in the included studies, including details of the tool(s) used, how many reviewers assessed each study and whether they worked independently, and if applicable, details of automation tools used in the process.                                    | Page 5                          |
| Effect measures               | 12     | Specify for each outcome the effect measure(s) (e.g. risk ratio, mean difference) used in the synthesis or presentation of results.                                                                                                                                                                  | NA                              |
| Synthesis methods             | 13a    | Describe the processes used to decide which studies were eligible for each synthesis (e.g. tabulating the study intervention characteristics and comparing against the planned groups for each synthesis (item #5)).                                                                                 | Page 5                          |

| Section and Topic             | Item # | Checklist item                                                                                                                                                                                                                                                                       | Location where item is reported |
|-------------------------------|--------|--------------------------------------------------------------------------------------------------------------------------------------------------------------------------------------------------------------------------------------------------------------------------------------|---------------------------------|
|                               | 13b    | Describe any methods required to prepare the data for presentation or synthesis, such as handling of missing summary statistics, or data conversions.                                                                                                                                | Page 5                          |
|                               | 13c    | Describe any methods used to tabulate or visually display results of individual studies and syntheses.                                                                                                                                                                               | Page 5                          |
|                               | 13d    | Describe any methods used to synthesize results and provide a rationale for the choice(s). If meta-analysis was performed, describe the model(s), method(s) to identify the presence and extent of statistical heterogeneity, and software package(s) used.                          | Page 5                          |
|                               | 13e    | Describe any methods used to explore possible causes of heterogeneity among study results (e.g. subgroup analysis, meta-regression).                                                                                                                                                 | NA                              |
|                               | 13f    | Describe any sensitivity analyses conducted to assess robustness of the synthesized results.                                                                                                                                                                                         | NA                              |
| Reporting bias assessment     | 14     | Describe any methods used to assess risk of bias due to missing results in a synthesis (arising from reporting biases).                                                                                                                                                              | NA                              |
| Certainty assessment          | 15     | Describe any methods used to assess certainty (or confidence) in the body of evidence for an outcome.                                                                                                                                                                                | NA                              |
| <b>RESULTS</b>                |        |                                                                                                                                                                                                                                                                                      |                                 |
| Study selection               | 16a    | Describe the results of the search and selection process, from the number of records identified in the search to the number of studies included in the review, ideally using a flow diagram.                                                                                         | Page 6 and Figure 1             |
|                               | 16b    | Cite studies that might appear to meet the inclusion criteria, but which were excluded, and explain why they were excluded.                                                                                                                                                          | NA                              |
| Study characteristics         | 17     | Cite each included study and present its characteristics.                                                                                                                                                                                                                            | Page 6                          |
| Risk of bias in studies       | 18     | Present assessments of risk of bias for each included study.                                                                                                                                                                                                                         | Page 6                          |
| Results of individual studies | 19     | For all outcomes, present, for each study: (a) summary statistics for each group (where appropriate) and (b) an effect estimate and its precision (e.g. confidence/credible interval), ideally using structured tables or plots.                                                     | Pages 7 to 10                   |
| Results of syntheses          | 20a    | For each synthesis, briefly summarise the characteristics and risk of bias among contributing studies.                                                                                                                                                                               | Pages 7 to 10                   |
|                               | 20b    | Present results of all statistical syntheses conducted. If meta-analysis was done, present for each the summary estimate and its precision (e.g. confidence/credible interval) and measures of statistical heterogeneity. If comparing groups, describe the direction of the effect. | NA                              |
|                               | 20c    | Present results of all investigations of possible causes of heterogeneity among study results.                                                                                                                                                                                       | NA                              |
|                               | 20d    | Present results of all sensitivity analyses conducted to assess the robustness of the synthesized results.                                                                                                                                                                           | NA                              |
| Reporting biases              | 21     | Present assessments of risk of bias due to missing results (arising from reporting biases) for each synthesis assessed.                                                                                                                                                              | NA                              |
| Certainty of evidence         | 22     | Present assessments of certainty (or confidence) in the body of evidence for each outcome assessed.                                                                                                                                                                                  | NA                              |
| <b>DISCUSSION</b>             |        |                                                                                                                                                                                                                                                                                      |                                 |
| Discussion                    | 23a    | Provide a general interpretation of the results in the context of other evidence.                                                                                                                                                                                                    | Pages 10 to 11                  |

| Section and Topic                              | Item # | Checklist item                                                                                                                                                                                                                             | Location where item is reported |
|------------------------------------------------|--------|--------------------------------------------------------------------------------------------------------------------------------------------------------------------------------------------------------------------------------------------|---------------------------------|
|                                                | 23b    | Discuss any limitations of the evidence included in the review.                                                                                                                                                                            | Page 12                         |
|                                                | 23c    | Discuss any limitations of the review processes used.                                                                                                                                                                                      | Page 12                         |
|                                                | 23d    | Discuss implications of the results for practice, policy, and future research.                                                                                                                                                             | Page 12                         |
| <b>OTHER INFORMATION</b>                       |        |                                                                                                                                                                                                                                            |                                 |
| Registration and protocol                      | 24a    | Provide registration information for the review, including register name and registration number, or state that the review was not registered.                                                                                             | NA                              |
|                                                | 24b    | Indicate where the review protocol can be accessed, or state that a protocol was not prepared.                                                                                                                                             | NA                              |
|                                                | 24c    | Describe and explain any amendments to information provided at registration or in the protocol.                                                                                                                                            | NA                              |
| Support                                        | 25     | Describe sources of financial or non-financial support for the review, and the role of the funders or sponsors in the review.                                                                                                              | Page 13                         |
| Competing interests                            | 26     | Declare any competing interests of review authors.                                                                                                                                                                                         | Page 14                         |
| Availability of data, code and other materials | 27     | Report which of the following are publicly available and where they can be found: template data collection forms; data extracted from included studies; data used for all analyses; analytic code; any other materials used in the review. | Page 16                         |

From: Page MJ, McKenzie JE, Bossuyt PM, Boutron I, Hoffmann TC, Mulrow CD, et al. The PRISMA 2020 statement: an updated guideline for reporting systematic reviews. *BMJ* 2021;372:n71. doi: 10.1136/bmj.n71

For more information, visit: <http://www.prisma-statement.org/>

## Supplementary File 2. Search Strategy

Searches carried out 26/05/23 by CE, Research Assistant Information Specialist, Evidence Synthesis Group.

### Summary of results

| Database                           | Search date | Results |
|------------------------------------|-------------|---------|
| ASSIA                              | 26/05/23    | 603     |
| Medline                            | 26/05/23    | 189     |
| PsycINFO                           | 26/05/23    | 136     |
| CINHAL                             | 26/05/23    | 85      |
|                                    |             |         |
|                                    |             |         |
| <b>Total BEFORE de-duplication</b> |             | 1013    |
| <b>Total AFTER de-duplication</b>  |             | 797     |

| Database                           | Search date | Results |
|------------------------------------|-------------|---------|
| ASSIA                              | 13/06/23*   | 606     |
| Medline                            | 26/05/23    | 189     |
| PsycINFO                           | 26/05/23    | 136     |
| CINHAL                             | 26/05/23    | 85      |
|                                    |             |         |
|                                    |             |         |
| <b>Total BEFORE de-duplication</b> |             | 1016    |
| <b>Total AFTER de-duplication</b>  |             | 895     |

\*Searches carried out 26/05/2023 across all databases. ASSIA search re-ran 13/06/23 due to an export error. Following the re-run, 3 additional records were retrieved. After deduplication, 98 additional records were sent for screening.

Search strategy as applied to ASSIA. Search date: 26/05/23

| # | Searches                                                                                                                                                                                                                                                                                                                                                                                                                                                                                                                                                                                                                                                   | Results |
|---|------------------------------------------------------------------------------------------------------------------------------------------------------------------------------------------------------------------------------------------------------------------------------------------------------------------------------------------------------------------------------------------------------------------------------------------------------------------------------------------------------------------------------------------------------------------------------------------------------------------------------------------------------------|---------|
| 1 | TITLE((temperature NEAR/3 home*) OR (warm* NEAR/3 home*) OR (afford* NEAR/3 warm*) OR (keep* warm*) OR (cold* NEAR/3 home*) OR (freez* NEAR/3 home*) OR "fuel poverty" OR "fuel poor" OR "living standard*" OR "cost of living" OR "inadequate warmth" OR "vulnerable household*") OR ABSTRACT((temperature NEAR/3 home*) OR (warm* NEAR/3 home*) OR (afford* NEAR/3 warm*) OR (keep* warm*) OR (cold* NEAR/3 home*) OR (freez* NEAR/3 home*) OR "fuel poverty" OR "fuel poor" OR "living standard*" OR "cost of living" OR "inadequate warmth" OR "vulnerable household*") OR MAINSUBJECT.EXACT.EXPLODE("Poverty") OR MAINSUBJECT.EXACT("Cost of living") | 11,095  |
| 2 | TITLE(home OR house OR houses OR housing OR domicile* OR occupan* OR tenant OR tenancy) OR ABSTRACT(home OR house OR houses OR housing OR domicile* OR occupan* OR tenant OR tenancy) OR MAINSUBJECT.EXACT.EXPLODE("Housing") OR MAINSUBJECT.EXACT("Households")                                                                                                                                                                                                                                                                                                                                                                                           | 77,055  |
| 3 | TITLE(energy OR consumption OR heating OR insulation OR "energy efficiency" OR "switch* supplier" OR "switch* tariff" OR "warmth improvement" OR welfare OR benefit* OR grant* OR scheme* OR intervention* OR (recei* NEAR/2 benefit*)) OR ABSTRACT(energy OR consumption OR heating OR insulation OR "energy efficiency" OR "switch* supplier" OR "switch* tariff" OR "warmth improvement" OR welfare OR benefit* OR grant* OR scheme* OR intervention* OR (recei* NEAR/2 benefit*)) OR MAINSUBJECT.EXACT("Heating") OR MAINSUBJECT.EXACT("Energy consumption") OR MAINSUBJECT.EXACT.EXPLODE("Financial support") OR                                      | 248,889 |

|   |                                                                                                                      |     |
|---|----------------------------------------------------------------------------------------------------------------------|-----|
|   | MAINSUBJECT.EXACT("Welfare benefits") OR MAINSUBJECT.EXACT("Social welfare") OR MAINSUBJECT.EXACT("Social security") |     |
| 4 | 1 AND 2 AND 3                                                                                                        | 806 |
| 5 | pd(20100101-20231231)                                                                                                | 603 |

Search date: 26/05/2023

| # | Searches                                                                                                                                                                                                                                                                                                                                                                                                                                                                                                                                                                                                                                                   | Results |
|---|------------------------------------------------------------------------------------------------------------------------------------------------------------------------------------------------------------------------------------------------------------------------------------------------------------------------------------------------------------------------------------------------------------------------------------------------------------------------------------------------------------------------------------------------------------------------------------------------------------------------------------------------------------|---------|
| 1 | TITLE((temperature NEAR/3 home*) OR (warm* NEAR/3 home*) OR (afford* NEAR/3 warm*) OR (keep* warm*) OR (cold* NEAR/3 home*) OR (freez* NEAR/3 home*) OR "fuel poverty" OR "fuel poor" OR "living standard*" OR "cost of living" OR "inadequate warmth" OR "vulnerable household*") OR ABSTRACT((temperature NEAR/3 home*) OR (warm* NEAR/3 home*) OR (afford* NEAR/3 warm*) OR (keep* warm*) OR (cold* NEAR/3 home*) OR (freez* NEAR/3 home*) OR "fuel poverty" OR "fuel poor" OR "living standard*" OR "cost of living" OR "inadequate warmth" OR "vulnerable household*") OR MAINSUBJECT.EXACT.EXPLODE("Poverty") OR MAINSUBJECT.EXACT("Cost of living") | 11,138  |
| 2 | TITLE(home OR house OR houses OR housing OR domicile* OR occupan* OR tenant OR tenancy) OR ABSTRACT(home OR house OR houses OR housing OR domicile* OR occupan* OR tenant OR tenancy) OR MAINSUBJECT.EXACT.EXPLODE("Housing") OR MAINSUBJECT.EXACT("Households")                                                                                                                                                                                                                                                                                                                                                                                           | 77,221  |
| 3 | TITLE(energy OR consumption OR heating OR insulation OR "energy efficiency" OR "switch* supplier" OR "switch* tariff" OR "warmth improvement" OR welfare OR benefit* OR grant* OR scheme* OR intervention* OR (recei* NEAR/2 benefit*)) OR ABSTRACT(energy OR consumption OR heating OR insulation OR "energy efficiency" OR "switch* supplier" OR "switch* tariff" OR "warmth improvement" OR welfare OR benefit* OR grant* OR scheme* OR intervention* OR (recei* NEAR/2 benefit*)) OR MAINSUBJECT.EXACT("Heating") OR MAINSUBJECT.EXACT("Energy consumption") OR                                                                                        | 249,742 |

|   |                                                                                                                                                                              |     |
|---|------------------------------------------------------------------------------------------------------------------------------------------------------------------------------|-----|
|   | MAINSUBJECT.EXACT.EXPLODE("Financial support") OR<br>MAINSUBJECT.EXACT("Welfare benefits") OR MAINSUBJECT.EXACT("Social<br>welfare") OR MAINSUBJECT.EXACT("Social security") |     |
| 4 | 1 AND 2 AND 3                                                                                                                                                                | 809 |
| 5 | pd(20100101-20231231)                                                                                                                                                        | 606 |

## Grey literature search

### Date

| accessed   | URL                                                                                                                                                                                                                                                                                                                       |
|------------|---------------------------------------------------------------------------------------------------------------------------------------------------------------------------------------------------------------------------------------------------------------------------------------------------------------------------|
| 19/04/2023 | <a href="https://assets.publishing.service.gov.uk/government/uploads/system/uploads/attachment_data/file/355790/Briefing7_Fuel_poverty_health_inequalities.pdf">https://assets.publishing.service.gov.uk/government/uploads/system/uploads/attachment_data/file/355790/Briefing7_Fuel_poverty_health_inequalities.pdf</a> |
| 19/04/2023 | <a href="https://www.nhsglos.nhs.uk/news/warm-home-scheme-supports-vulnerable-people-to-pay-their-energy-bills/">https://www.nhsglos.nhs.uk/news/warm-home-scheme-supports-vulnerable-people-to-pay-their-energy-bills/</a>                                                                                               |
| 19/04/2023 | <a href="https://www.kirklees.gov.uk/beta/delivering-services/pdf/warmzone-process-report.pdf">https://www.kirklees.gov.uk/beta/delivering-services/pdf/warmzone-process-report.pdf</a>                                                                                                                                   |
| 19/04/2023 | <a href="https://www.gov.uk/the-warm-home-discount-scheme">https://www.gov.uk/the-warm-home-discount-scheme</a>                                                                                                                                                                                                           |
| 19/04/2023 | <a href="https://www.changeworks.org.uk/case-studies/external-wall-insulation-transforms-borders-home">https://www.changeworks.org.uk/case-studies/external-wall-insulation-transforms-borders-home</a>                                                                                                                   |
| 19/04/2023 | <a href="https://localenergy.scot/case-studies/?pg=3">https://localenergy.scot/case-studies/?pg=3</a>                                                                                                                                                                                                                     |
| 19/04/2023 | <a href="https://www.healthyhousing.org.nz/our-research/past-research/evaluation-warm-new-zealand-heat-smart-programme">https://www.healthyhousing.org.nz/our-research/past-research/evaluation-warm-new-zealand-heat-smart-programme</a>                                                                                 |
| 19/04/2023 | <a href="https://www.wakefield.gov.uk/Documents/housing/wakefield-heca-report-2021.pdf">https://www.wakefield.gov.uk/Documents/housing/wakefield-heca-report-2021.pdf</a>                                                                                                                                                 |
| 19/04/2023 | <a href="https://khub.net/documents/135939561/174099487/Cold+Weather+Plan+++Making+the+Case.pdf/69c22c83-1b1f-cfb9-0e2d-8f603a7b426e?t=1635339855693">https://khub.net/documents/135939561/174099487/Cold+Weather+Plan+++Making+the+Case.pdf/69c22c83-1b1f-cfb9-0e2d-8f603a7b426e?t=1635339855693</a>                     |
| 19/04/2023 | <a href="https://www.ofgem.gov.uk/environmental-and-social-schemes/energy-company-obligation-eco">https://www.ofgem.gov.uk/environmental-and-social-schemes/energy-company-obligation-eco</a>                                                                                                                             |
| 19/04/2023 | <a href="https://www.ageuk.org.uk/our-impact/programmes/safe-and-warm/">https://www.ageuk.org.uk/our-impact/programmes/safe-and-warm/</a>                                                                                                                                                                                 |
| 19/04/2023 | <a href="https://cafs.org.uk/cold-to-cosy-homes-eligibility-criteria/">https://cafs.org.uk/cold-to-cosy-homes-eligibility-criteria/</a>                                                                                                                                                                                   |
| 19/04/2023 | <a href="https://www.cornwall.gov.uk/council-news/communities-and-housing/energy-saving-improvements-made-to-more-than-600-cornwall-council-homes/">https://www.cornwall.gov.uk/council-news/communities-and-housing/energy-saving-improvements-made-to-more-than-600-cornwall-council-homes/</a>                         |
| 19/04/2023 | <a href="https://www.trustmark.org.uk/news/press-releases/2022/11/16/home-energy-efficiency-experts-suppliers-gather-to-provide-retrofit-guidance">https://www.trustmark.org.uk/news/press-releases/2022/11/16/home-energy-efficiency-experts-suppliers-gather-to-provide-retrofit-guidance</a>                           |



19/04/2023 <https://www.nice.org.uk/sharedlearning/wigan-council-s-affordable-warmth-access-referral-mechanism-awarm---the-original-single-point-of-contact-health-and-housing-referral-service-for-people-living-in-cold-homes-as-recommended-by-nice-guidelines-ng6>

19/04/2023 <https://www.nea.org.uk/>

19/04/2023 <https://www.nea.org.uk/who-we-are/innovation-technical-evaluation/domestic-batteries-devon/>

04/05/2023 <https://link.springer.com/article/10.1186/s12889-022-12994-4>

04/05/2023 <https://www.instituteofhealthequity.org/resources-reports/fuel-poverty-cold-homes-and-health-inequalities-in-the-uk/read-the-report.pdf>

04/05/2023 <https://onlinelibrary.wiley.com/doi/full/10.1111/ina.13101>

09/05/2023 <https://www.ageuk.org.uk/globalassets/age-uk/documents/reports-and-publications/reports-and-briefings/safe-at-home/age-uk-energy-public-policy-report-march-2023.pdf>

09/05/2023 [https://www.nea.org.uk/wp-content/uploads/2023/01/3830\\_NEA\\_Fuel-Poverty-Monitor-Report-2022\\_V2-1.pdf](https://www.nea.org.uk/wp-content/uploads/2023/01/3830_NEA_Fuel-Poverty-Monitor-Report-2022_V2-1.pdf)

09/05/2023 <https://ageing-better.org.uk/sites/default/files/2022-03/CaCHE-Past-Present-and-Future-Housing-Policy.pdf>

09/05/2023 [https://www.housinglin.org.uk/\\_assets/Resources/Housing/Support\\_materials/Practice\\_briefings/HLIN\\_PracticeBriefing\\_HealthInequalities.pdf](https://www.housinglin.org.uk/_assets/Resources/Housing/Support_materials/Practice_briefings/HLIN_PracticeBriefing_HealthInequalities.pdf)

09/05/2023 <https://www.housinglin.org.uk/Topics/type/Cold-Homes-Toolkit/>

09/05/2023 <https://www.housinglin.org.uk/Topics/type/The-cost-of-cold-why-we-need-to-protect-the-health-of-older-people-in-winter/>

09/05/2023 <https://www.housinglin.org.uk/Topics/type/Warm-homes-for-health-briefing/>

09/05/2023 <https://www.housinglin.org.uk/Topics/type/Building-comfort-for-old-age-Designing-and-managing-thermal-comfort-in-low-carbon-housing-for-older-people/>

09/05/2023 <https://www.nice.org.uk/guidance/ng6>

10/05/2023 <https://www.britishgas.co.uk/energy/energy-saving/warm-home-discount.html>

10/05/2023 <https://www.britishgas.co.uk/home-services/home-improvements/powerflush.html>

10/05/2023 <https://www.britishgas.co.uk/smart-home.html#products>

10/05/2023 <https://www.britishgas.co.uk/smart-home/smart-meters.html>

10/05/2023 <https://www.britishgas.co.uk/home-services/boilers-and-heating/air-source-heat-pumps.html>

10/05/2023 <https://www.britishgas.co.uk/smart-home/greener-homes/solar-products.html>

10/05/2023 <https://www.britishgas.co.uk/energy/smart-export-guarantee.html>

10/05/2023 <https://www.edfenergy.com/help-support/warm-home-discount-0>

10/05/2023 <https://www.edfenergy.com/heating/insulation>

10/05/2023 <https://www.edfenergy.com/heating/insulation/loft>

10/05/2023 <https://www.edfenergy.com/heating/insulation/cavity-wall>

10/05/2023 <https://www.edfenergy.com/solar>

10/05/2023 <https://www.edfenergy.com/energy-efficiency/smart-export-tariff>

10/05/2023 <https://www.edfenergy.com/eco4-subsidised-energy-efficiency-measures>

10/05/2023 <https://www.edfenergy.com/energy-efficiency/the-great-british-insulation-scheme>

10/05/2023 <https://www.edfenergy.com/smart-meters>

10/05/2023 <https://www.eonnext.com/warm-home-discount>

10/05/2023 <https://www.eonnext.com/policies/energy-efficiency>

10/05/2023 <https://www.eonnext.com/smart>

10/05/2023 <https://www.scottishpower.co.uk/ebss>

10/05/2023 <https://www.scottishpower.co.uk/ebss/alternative-fuel-payment>

10/05/2023 <https://www.scottishpower.co.uk/solar-panels>

10/05/2023 [https://web-content.scottishpower.co.uk/files/pdf/Better\\_Home\\_Cooler%20Planet\\_Final\\_Web\\_Report\\_19\\_July\\_2022.pdf?nocache=true](https://web-content.scottishpower.co.uk/files/pdf/Better_Home_Cooler%20Planet_Final_Web_Report_19_July_2022.pdf?nocache=true)

10/05/2023 <https://www.scottishpower.co.uk/air-source-heat-pumps>

10/05/2023 <https://www.scottishpower.co.uk/energy-efficiency/smart-meters>

10/05/2023 <https://www.scottishpower.co.uk/tado>

10/05/2023 <https://www.sse.com/what-we-do/net-zero-acceleration-programme/>

10/05/2023 <https://www.ssen-transmission.co.uk/projects/2030-projects/>

10/05/2023 <https://www.ovoenergy.com/guides/energy-guides/warm-home-discount-scheme>

10/05/2023 <https://www.ovoenergy.com/smart-meters>

10/05/2023 <https://www.ovoenergy.com/smart-home/smart-thermostat>

10/05/2023 <https://www.ovoenergy.com/heat-pumps>

10/05/2023 <https://www.ovoenergy.com/solar-panels>

10/05/2023 <https://www.ovoenergy.com/energy-tracker>

10/05/2023 [https://assets.publishing.service.gov.uk/government/uploads/system/uploads/attachment\\_data/file/355790/Briefing7\\_Fuel\\_poverty\\_health\\_inequalities.pdf](https://assets.publishing.service.gov.uk/government/uploads/system/uploads/attachment_data/file/355790/Briefing7_Fuel_poverty_health_inequalities.pdf)

10/05/2023 <https://beatcold.org.uk/wp-content/uploads/2011/09/Awarm-evaluation-final-report.pdf>

10/05/2023 [https://assets.publishing.service.gov.uk/government/uploads/system/uploads/attachment\\_data/file/451025/DECC\\_FINAL.pdf](https://assets.publishing.service.gov.uk/government/uploads/system/uploads/attachment_data/file/451025/DECC_FINAL.pdf)

Supplementary File 3. Hierarchy of exclusion criteria

1. Is the study published in the English language? If yes, go to Q2. If no, exclude on LANGUAGE.
2. Is the study published from 2010 onwards? If yes, go to Q3. If no, exclude on DATE.
3. Does the study report an evaluation (quantitative or mixed methods)? If yes, go to Q4. If no, exclude on STUDY DESIGN.
4. Does the study evaluate an eligible intervention? If yes, go to Q5. If no, exclude on INTERVENTION.
5. Does the study evaluate the intervention for populations aged 18+? If yes, go to Q6. If no, exclude on POPULATION.
6. Does the study evaluate eligible outcomes? If yes, INCLUDE. If no, exclude on OUTCOME.

Supplementary File 4: Quality appraisal of included studies using NIH Quality Assessment Tool (RCTs)

| Author (year)                                                                                                                                                    | Osman et al 2010 | Heyman et al 2011 | Saeki et al 2015 | Page et al 2022  |
|------------------------------------------------------------------------------------------------------------------------------------------------------------------|------------------|-------------------|------------------|------------------|
| Was the study described as randomized, a randomized trial, a randomized clinical trial, or an RCT?                                                               | Yes              | Yes               | Yes              | Yes              |
| Was the method of randomization adequate (i.e., use of randomly generated assignment)?                                                                           | Not reported     | Yes               | Yes              | Yes              |
| Was the treatment allocation concealed (so that assignments could not be predicted)?                                                                             | Not reported     | Cannot determine  | Yes              | Cannot determine |
| Were study participants and providers blinded to treatment group assignment?                                                                                     | Not reported     | Not reported      | Not reported     | Cannot determine |
| Were the people assessing the outcomes blinded to the participants' group assignments?                                                                           | Not reported     | Not reported      | Not reported     | Cannot determine |
| Were the groups similar at baseline on important characteristics that could affect outcomes (e.g., demographics, risk factors, co-morbid conditions)?            | Yes              | Yes               | Yes              | Yes              |
| Was the overall drop-out rate from the study at endpoint 20% or lower of the number allocated to treatment?                                                      | Yes              | No                | Yes              | No               |
| Was the differential drop-out rate (between treatment groups) at endpoint 15 percentage points or lower?                                                         | Yes              | No                | Not reported     | No               |
| Was there high adherence to the intervention protocols for each treatment group?                                                                                 | Yes              | Not applicable    | Yes              | Yes              |
| Were other interventions avoided or similar in the groups (e.g., similar background treatments)?                                                                 | Not reported     | No                | Not reported     | Not reported     |
| Were outcomes assessed using valid and reliable measures, implemented consistently across all study participants?                                                | Yes              | Yes               | Yes              | Yes              |
| Did the authors report that the sample size was sufficiently large to be able to detect a difference in the main outcome between groups with at least 80% power? | Yes              | Not reported      | Not reported     | Not reported     |
| Were outcomes reported or subgroups analyzed prespecified (i.e., identified before analyses were conducted)?                                                     | Yes              | Yes               | Yes              | Yes              |

|                                                                                                                                                          |             |             |             |             |
|----------------------------------------------------------------------------------------------------------------------------------------------------------|-------------|-------------|-------------|-------------|
| <i>Were all randomized participants analyzed in the group to which they were originally assigned, i.e., did they use an intention-to-treat analysis?</i> | Yes         | No          | No          | Yes         |
| <b>Overall Quality Rating (Good, Fair, or Poor)</b>                                                                                                      | <b>Fair</b> | <b>Poor</b> | <b>Fair</b> | <b>Poor</b> |

Quality appraisal of included studies using NIH Quality Assessment Tool (non-RCTs)

| <b>Author (year)</b>                                                                                                                                                         | <b>Liddell et al 2011</b> | <b>Telfar-Barnard et al 2011</b> | <b>Curl and Kearns 2015</b> | <b>Curl et al 2015</b> | <b>Edwards et al 2016</b> | <b>Bray et al 2017</b> | <b>Poortin ga et al 2017</b> | <b>Preval et al 2017</b> | <b>Peralta et al 2017</b> | <b>Poortin ga et al 2018a</b> | <b>Poortin ga et al 2018b</b> | <b>Poortin ga et al 2018c</b> | <b>Rodgers et al 2018</b> | <b>Pollard et al 2019</b> | <b>Fyfe 2021</b> | <b>Carrere et al 2022</b> | <b>Tonn et al 2023</b> |
|------------------------------------------------------------------------------------------------------------------------------------------------------------------------------|---------------------------|----------------------------------|-----------------------------|------------------------|---------------------------|------------------------|------------------------------|--------------------------|---------------------------|-------------------------------|-------------------------------|-------------------------------|---------------------------|---------------------------|------------------|---------------------------|------------------------|
| <i>Was the study question or objective clearly stated?</i>                                                                                                                   | Yes                       | Yes                              | Yes                         | Yes                    | Yes                       | Yes                    | Yes                          | Yes                      | Yes                       | Yes                           | Yes                           | Yes                           | Yes                       | Cannot determine          | Yes              | Yes                       | Yes                    |
| <i>Were eligibility/selection criteria for the study population prespecified and clearly described?</i>                                                                      | Yes                       | Yes                              | Yes                         | Yes                    | Yes                       | Yes                    | Yes                          | Yes                      | Not applicable            | Yes                           | Yes                           | Yes                           | Yes                       | No                        | Yes              | Yes                       | No                     |
| <i>Were the participants in the study representative of those who would be eligible for the test/service/intervention in the general or clinical population of interest?</i> | Yes                       | Yes                              | Yes                         | Yes                    | Not reported              | Yes                    | Yes                          | Yes                      | Cannot determine          | Yes                           | Yes                           | Yes                           | Yes                       | No                        | Yes              | Yes                       | Cannot determine       |
| <i>Were all eligible participants that met the prespecified entry criteria enrolled?</i>                                                                                     | Yes                       | Yes                              | Yes                         | Yes                    | Yes                       | Yes                    | Yes                          | Yes                      | Not applicable            | Yes                           | Yes                           | Cannot determine              | Yes                       | Yes                       | Yes              | Cannot determine          | Cannot determine       |

|                                                                                                                                           |              |                |                |                |                  |     |              |                |                  |                |                |                |                |              |                |     |                |
|-------------------------------------------------------------------------------------------------------------------------------------------|--------------|----------------|----------------|----------------|------------------|-----|--------------|----------------|------------------|----------------|----------------|----------------|----------------|--------------|----------------|-----|----------------|
| <i>Was the sample size sufficiently large to provide confidence in the findings?</i>                                                      | Yes          | Yes            | Yes            | Yes            | Cannot determine | Yes | Yes          | Yes            | Cannot determine | Yes            | Yes            | Yes            | Yes            | No           | Yes            | Yes | Yes            |
| <i>Was the test/service/intervention clearly described and delivered consistently across the study population?</i>                        | Yes          | Yes            | Yes            | Yes            | Yes              | Yes | Yes          | Yes            | Not applicable   | Yes            | Yes            | Yes            | Yes            | Yes          | Yes            | Yes | Yes            |
| <i>Were the outcome measures prespecified, clearly defined, valid, reliable, and assessed consistently across all study participants?</i> | Yes          | Yes            | No             | No             | Yes              | Yes | Yes          | No             | Yes              | Yes            | Yes            | Yes            | No             | Yes          | Yes            | Yes | Yes            |
| <i>Were the people assessing the outcomes blinded to the participants' exposures/interventions?</i>                                       | No           | Not applicable | Not applicable | Not applicable | No               | No  | Not reported | Not reported   | No               | Not applicable | Not applicable | Not applicable | Not applicable | No           | Not reported   | No  | Not applicable |
| <i>Was the loss to follow-up after baseline 20% or less? Were those lost to follow-up accounted for in the analysis?</i>                  | Not reported | Not applicable | Not applicable | Not applicable | Not reported     | No  | Not reported | Not applicable | Not reported     | Not reported   | No             | Not reported   | Not applicable | Not reported | Not applicable | No  | Not applicable |
| <i>Did the statistical methods examine changes in outcome measures from before to</i>                                                     | Not reported | Yes            | Yes            | Yes            | No               | Yes | No           | Yes            | Not applicable   | Yes            | Yes            | Not applicable | Yes            | No           | Yes            | Yes | Yes            |

|                                                                                                                                                                                                                                |      |      |      |      |      |      |                |      |      |      |      |                  |      |      |      |      |      |
|--------------------------------------------------------------------------------------------------------------------------------------------------------------------------------------------------------------------------------|------|------|------|------|------|------|----------------|------|------|------|------|------------------|------|------|------|------|------|
| <i>after the intervention? Were statistical tests done that provided p values for the pre-to-post changes?</i>                                                                                                                 |      |      |      |      |      |      |                |      |      |      |      |                  |      |      |      |      |      |
| <i>Were outcome measures of interest taken multiple times before the intervention and multiple times after the intervention (i.e., did they use an interrupted time-series design)?</i>                                        | No   | No   | Yes  | Yes  | No   | No   | Not applicable | Yes  | No   | No   | No   | No               | No   | No   | No   | No   | No   |
| <i>If the intervention was conducted at a group level (e.g., a whole hospital, a community, etc.) did the statistical analysis take into account the use of individual-level data to determine effects at the group level?</i> | Yes  | Yes  | Yes  | Yes  | No   | No   | Not applicable | Yes  | No   | Yes  | Yes  | Cannot determine | Yes  | No   | Yes  | No   | No   |
| <b>Overall Quality Rating (Good, Fair, or Poor)</b>                                                                                                                                                                            | Poor | Fair | Fair | Fair | Fair | Poor | Fair           | Fair | Poor | Fair | Poor | Fair             | Poor | Poor | Fair | Poor | Poor |



Supplementary File 5. Effectiveness of interventions: data summary table

| Author, year    | Type of intervention | Outcomes            | Outcome measures                                                                                            | Key statistical findings                                           |
|-----------------|----------------------|---------------------|-------------------------------------------------------------------------------------------------------------|--------------------------------------------------------------------|
| Bray et al 2017 | Structural           | Quality of life     | Self-rated household health status, as measured using a visual analogue scale (VAS)                         | t = -2.652, p=0.009                                                |
|                 |                      |                     | Self-rated main tenant health status, as measured using a visual analogue scale (VAS)                       | t = -3.564, p<0.001                                                |
|                 |                      |                     | Main tenant health-related quality-of-life score, EQ-5D-3L validated health-related quality-of-life (HRQoL) | t = 0.583                                                          |
|                 |                      |                     | Main tenant well-being score, Short Warwick-Edinburgh Well-being Scale (SWEMWBS)                            | t = -1.403                                                         |
|                 |                      |                     | Main tenant Life satisfaction score, ONS personal well-being measure                                        | t = -0.615                                                         |
|                 |                      |                     | Main tenant happiness score, ONS personal well-being measure                                                | t = -1.573                                                         |
|                 |                      |                     | Main tenant anxiety score, ONS personal well-being measure                                                  | t = 1.518                                                          |
|                 |                      |                     | Main tenant financial satisfaction score, ONS personal well-being measure                                   | t = -2.340, p=0.020                                                |
|                 |                      | Non-health outcomes | Rooms left unheated, fuel poverty                                                                           | t = 5.973; p<0.001                                                 |
|                 |                      | Cost analysis       | General practitioner, Health service use costs on primary care and secondary care, frequency                | MC = -0.65 (9.07); Cost change -£24.94 (-£94.87, £30.63)           |
|                 |                      |                     | Hospital inpatient, Health service use costs on primary care and secondary care, frequency                  | MC = -0.01 (0.88); Cost change -£9.34 (-£133.09, £116.74)          |
|                 |                      |                     | Hospital outpatient, Health service use costs on primary care and secondary care, frequency                 | MC = -0.30 (1.31), p=0.001; Cost change -£38.86 (-£64.57, -£15.43) |
|                 |                      |                     | Accident/emergency, Health service use costs on primary care and secondary care, frequency                  | MC = -0.18 (1.06); Cost change -£30.99 (-£57.33, -£3.10)           |
|                 |                      |                     | Total, Health service use costs on primary care and secondary care, frequency                               | -£94.79 (-£273.01, £85.14)                                         |

|                         |             |                                                                                       |                                                                                                                                                                                                                                                                                                                                                                                                                                                                                                                                                                                                                                                                                                                                                                                                                                                                                                       |                                                                                                                                                                                                                                                                                                                                                                                                              |
|-------------------------|-------------|---------------------------------------------------------------------------------------|-------------------------------------------------------------------------------------------------------------------------------------------------------------------------------------------------------------------------------------------------------------------------------------------------------------------------------------------------------------------------------------------------------------------------------------------------------------------------------------------------------------------------------------------------------------------------------------------------------------------------------------------------------------------------------------------------------------------------------------------------------------------------------------------------------------------------------------------------------------------------------------------------------|--------------------------------------------------------------------------------------------------------------------------------------------------------------------------------------------------------------------------------------------------------------------------------------------------------------------------------------------------------------------------------------------------------------|
| Carrere et. al.<br>2022 | Behavioural | Physical health<br>Mental health<br>Health service utilisation<br>Non-health outcomes | Self-perceived poor health<br>Depression and/or anxiety<br>Use of anxiolytics, antidepressant or sleeping pills<br>Primary care visits a year<br>Inability to keep home adequately cool<br>Inability to keep home adequately warm<br>Arrears utility bills                                                                                                                                                                                                                                                                                                                                                                                                                                                                                                                                                                                                                                            | % Ave ME: - 0.9% (-13.2%, 11.4%)<br>% Ave ME: 1.3% (-18.6%, 21.2%)<br>% Ave ME: 8.6% (-0.1%, 17.3%)<br>% Ave ME: - 27.3% (-42.0%, -12.6%),<br>p<0.001<br>% Ave ME: - 27.3% (-46.4%, -8.2%),<br>p<0.01<br>% Ave ME: - 30.4% (-55.0%, -5.8%),<br>p<0.01<br>% Ave ME: - 21.5% (2.3%, 40.7%),<br>p<0.05                                                                                                          |
| Curl and Kearns<br>2015 | Structural  | Physical health                                                                       | Recovery from respiratory conditions, central heating<br>Recovery from circulatory conditions, central heating<br>Prevention of respiratory diseases, central heating<br>Prevention of circulatory diseases, central heating<br>Prevention of respiratory diseases if remain in employment, central heating<br>Prevention of circulatory diseases if remain in employment, central heating<br>Prevention of respiratory diseases if w/ pre-existing conditions, central heating<br>Prevention of circulatory diseases if w/ pre-existing conditions, central heating<br>Prevention of respiratory diseases in 5 years, central heating<br>Prevention of respiratory diseases in 2 years, central heating<br>Prevention of circulatory diseases in 5 years, central heating<br>Prevention of circulatory diseases in 2 years, central heating<br>Prevention of mental health diseases, central heating | OR = 0.81 (0.35, 1.9)<br>OR = 2.63 (1.17, 5.92), p<0.05<br>OR = 1.25 (0.82, 1.91)<br>OR = 1.02 (0.69, 1.53)<br>OR = 0.35 (0.16, 0.76), p<0.01<br>OR = 0.16 (0.06, 0.37), p<0.01<br>OR = 2.05 (1.48, 2.83), p<0.01<br>OR = 1.07 (0.77, 1.5)<br>OR = 2.79 (1.72, 4.52), p<0.01<br>OR = 1.83 (1.03, 3.25), p<0.05<br>OR = 2.39 (1.54, 3.74), p<0.01<br>OR = 1.71 (1.02, 2.87), p<0.05<br>OR = 1.01 (0.26, 3.97) |

|                      |            |                                            |                                                                                                                                                                                                                                                                                                                                                                                                                                                                                                                                                                                                                                                                                                                                                                                                                                                                          |                                                                                                                                                                                                                                                                                                                                                                                                                              |
|----------------------|------------|--------------------------------------------|--------------------------------------------------------------------------------------------------------------------------------------------------------------------------------------------------------------------------------------------------------------------------------------------------------------------------------------------------------------------------------------------------------------------------------------------------------------------------------------------------------------------------------------------------------------------------------------------------------------------------------------------------------------------------------------------------------------------------------------------------------------------------------------------------------------------------------------------------------------------------|------------------------------------------------------------------------------------------------------------------------------------------------------------------------------------------------------------------------------------------------------------------------------------------------------------------------------------------------------------------------------------------------------------------------------|
|                      |            | Mental health                              | Prevention of mental health diseases if remain in employment, central heating<br>Prevention of mental health diseases if over 65, central heating                                                                                                                                                                                                                                                                                                                                                                                                                                                                                                                                                                                                                                                                                                                        | OR = 0.17 (0.03, 0.83), p<0.05<br>OR = 0.25 (0.06, 0.98), p<0.001                                                                                                                                                                                                                                                                                                                                                            |
| Curl et al 2015      | Structural | Quality of life                            | Association of housing improvements with physical health, PCS-12 SF-12v2 scale, over 65<br>Association of kitchen and bathroom with physical health, PCS-12 SF-12v2 scale, over 65<br>Association of central heating with physical health, PCS-12 SF-12v2 scale, over 65<br>Association of doors with physical health, PCS-12 SF-12v2 scale, over 65<br>Association of fabric works with physical health, PCS-12 SF-12v2 scale, over 65<br>Association of housing improvements with mental health, MCS-12 SF-12v2 scale, over 65<br>Association of kitchen and bathroom with mental health, MCS-12 SF-12v2 scale, over 65<br>Association of central heating with mental health, MCS-12 SF-12v2 scale, over 65<br>Association of doors with mental health, MCS-12 SF-12v2 scale, over 65<br>Association of fabric works with mental health, MCS-12 SF-12v2 scale, over 65 | $\beta = -3.35 (-4.68, -2.02)$ , p<0.05<br>$\beta = -3.08 (-4.89, -1.27)$ , p<0.001<br>$\beta = -4.46 (-6.66, -2.26)$ , p<0.05<br>$\beta = -4.30 (-6.32, -2.27)$ , p<0.05<br>$\beta = -2.81 (-4.53, -1.09)$ , p<0.05<br>$\beta = 7.18 (5.94, 8.42)$ , p<0.05<br>$\beta = 8.19 (6.52, 9.85)$ , p<0.05<br>$\beta = 6.92 (4.65, 9.19)$ , p<0.05<br>$\beta = 7.74 (5.66, 9.81)$ , p<0.05<br>$\beta = 6.73 (5.14, 8.32)$ , p<0.05 |
| Edwards et. al. 2016 | Structural | Quality of life<br><br>Non-health outcomes | Household health status<br>Main tenant health status<br>Health-related quality of life<br>Mental well-being<br>Life satisfaction<br>Happiness<br>Anxiety<br>Financial satisfaction<br>Rooms unheated<br>GP visits in six months                                                                                                                                                                                                                                                                                                                                                                                                                                                                                                                                                                                                                                          | MC = 3.25<br>MC = 4.85<br>MC = -0.01<br>MC = 0.46<br>MC = 0.09<br>MC = 0.25<br>MC = -0.39<br>MC = 0.36<br>MC = -0.73<br>Reduced by 10%                                                                                                                                                                                                                                                                                       |

|           |            |                                             |                                                                                                                                                                                                                                                                                                                                                                                                                                                                                                                                                                                                                                                                                                                                                                                                                                                                                                                                                                                                                                                                                                                                                                                                                                                                                       |                                                                                                                                                                                                                                                                                                                                                                                                                                                                                            |
|-----------|------------|---------------------------------------------|---------------------------------------------------------------------------------------------------------------------------------------------------------------------------------------------------------------------------------------------------------------------------------------------------------------------------------------------------------------------------------------------------------------------------------------------------------------------------------------------------------------------------------------------------------------------------------------------------------------------------------------------------------------------------------------------------------------------------------------------------------------------------------------------------------------------------------------------------------------------------------------------------------------------------------------------------------------------------------------------------------------------------------------------------------------------------------------------------------------------------------------------------------------------------------------------------------------------------------------------------------------------------------------|--------------------------------------------------------------------------------------------------------------------------------------------------------------------------------------------------------------------------------------------------------------------------------------------------------------------------------------------------------------------------------------------------------------------------------------------------------------------------------------------|
|           |            | Health service utilisation<br>Cost analysis | Hospital visits in six months<br>Accident and emergency attendance in six months<br>Inpatient stays in six months<br>Household access on NHS health services                                                                                                                                                                                                                                                                                                                                                                                                                                                                                                                                                                                                                                                                                                                                                                                                                                                                                                                                                                                                                                                                                                                          | Reduced by 67%<br>Reduced by 45%<br>Reduced by 4%<br>£94 cost reduction per household, £45 per tenant                                                                                                                                                                                                                                                                                                                                                                                      |
| Fyfe 2021 | Structural | Health service utilisation                  | Rate of prescriptions dispensed for infectious diseases<br>Rate of prescriptions dispensed for prevention of symptoms of chronic respiratory diseases<br>Overall rate exacerbation sensitive medication of prescriptions dispensed to treat chronic respiratory disease, all<br>Rate exacerbation sensitive medication of prescriptions dispensed to treat chronic respiratory disease, 15-64<br>Rate exacerbation sensitive medication of prescriptions dispensed to treat chronic respiratory disease, 65 and over<br>Overall rate, prevention of symptoms of chronic disease incidence by medication measure<br>Prevention of symptoms of chronic disease incidence by medication measure, age 15-64<br>Prevention of symptoms of chronic disease incidence by medication measure, age 65 and over<br>Prevention of symptoms of chronic disease incidence by medication measure, European ethnicity<br>Prevention of symptoms of chronic disease incidence by medication measure, least deprived<br>Prevention of symptoms of chronic disease incidence by medication measure, whole house insulation<br>Overall hospital admission rates<br>Overall hospital admission rates, aged 15-64<br>Overall hospital admission rates, 65 and over<br>Hospital admissions per 1,000 people | RR = 0.98 (0.98-0.99), p<0.05<br>RR = 1.00 (0.99-1.00)<br>RR = 0.96 (0.96-0.97), p<0.05<br>RR = 0.95 (0.94-0.96), p<0.05<br>RR = 0.97 (0.96-0.98), p<0.05<br>RR = 0.93 (0.88-0.98), p<0.05<br>RR = 0.91 (0.85-98), p<0.05<br>RR = 0.92 (0.85-1.01)<br>RR = 0.91 (0.86- 0.97), p<0.05<br>RR = 0.85 (0.75-0.96), p<0.05<br>RR = 0.90 (0.84-0.85), p<0.05<br>RR = 0.89 (0.88-0.90), p<0.05<br>RR = 0.89 (0.86-0.91), p<0.05<br>RR = 0.88 (0.86-0.94), p<0.05<br>RR = 9.26 (9.05-9.47), p<0.05 |

|  |           |                                                                                                                                            |                                |
|--|-----------|--------------------------------------------------------------------------------------------------------------------------------------------|--------------------------------|
|  |           | Hospital admissions, asthma                                                                                                                | RR = 0.80 (0.70-0.90), p<0.05  |
|  |           | Hospital admissions, COPD adults aged 65 and over                                                                                          | RR = 0.80 (0.70-0.91), p<0.05  |
|  |           | Hospital admissions, ischaemic heart disease adults aged 65 and over                                                                       | RR = 0.75 (0.66-0.83), p<0.05  |
|  |           | Hospital admissions, whole house insulation                                                                                                | RR = 0.88 (0.85-0.90), p<0.05  |
|  |           | Hospital admissions, ceiling insulation                                                                                                    | RR = 0.88 (0.84-0.92), p<0.05  |
|  |           | Hospital admissions, heating                                                                                                               | RR = 0.89 (0.84-0.92)          |
|  | Mortality | No. of deaths, all cause mortality                                                                                                         | N = 4,569 (1.23%)              |
|  |           | Cold-associated mortality                                                                                                                  | N = 1,916 (0.52%)              |
|  |           | No. of deaths of people 65 and over with an all-cause hospital admission at baseline and died at follow-up, all cause mortality            | N = 1,516 (15.30%)             |
|  |           | No. of deaths of people 65 and over with an all-cause hospital admission at baseline and died at follow-up, cold-associated mortality      | N = 776 (7.83%)                |
|  |           | No. of deaths of people 65 and over with a cold-associated hospital admission at baseline and died at follow-up, all cause mortality       | N = 916 (19.20%)               |
|  |           | No. of deaths of people 65 and over with a cold-associated hospital admission at baseline and died at follow-up, cold-associated mortality | N = 558 (11.70%)               |
|  |           | Adjusted survival rates for all-cause mortality                                                                                            | HR = 1.01 (0.97-1.06)          |
|  |           | Adjusted survival rates for all-cause mortality, 15-64 years                                                                               | HR = 1.11 (1.02-1.22), p <0.05 |
|  |           | Adjusted survival rates for all-cause mortality, 65 and over                                                                               | HR = 0.98 (0.94-1.03)          |
|  |           | Unadjusted survival from cold-associated mortality                                                                                         | HR = 1.00 (0.93-1.06)          |
|  |           | Cold-associated mortality, all types of intervention, aged 65 and over cold-associated hospital admissions                                 | HR = 1.44 (1.00-1.30)          |
|  |           | Cold-associated mortality, insulation & heater, aged 65 and over cold-associated hospital admissions                                       | HR = 0.84 (0.53-1.36)          |

|                    |            |                                                                                                            |                                                                                                                                                                                                                                                                                                                                                                                                                                                                                                                                                                                  |                                                                                                                                                                                                                                                                                        |
|--------------------|------------|------------------------------------------------------------------------------------------------------------|----------------------------------------------------------------------------------------------------------------------------------------------------------------------------------------------------------------------------------------------------------------------------------------------------------------------------------------------------------------------------------------------------------------------------------------------------------------------------------------------------------------------------------------------------------------------------------|----------------------------------------------------------------------------------------------------------------------------------------------------------------------------------------------------------------------------------------------------------------------------------------|
|                    |            |                                                                                                            | <p>Cold-associated mortality, ceiling &amp; underfloor insulation, aged 65 and over cold-associated hospital admissions</p> <p>Cold-associated mortality, ceiling insulation only, aged 65 and over cold-associated hospital admissions</p> <p>Cold-associated mortality, underfloor insulation only, aged 65 and over cold-associated hospital admissions</p> <p>Cold-associated mortality, insulation top-up, aged 65 and over cold-associated hospital admissions</p>                                                                                                         | <p>HR = 1.15 (0.97-1.38)</p> <p>HR = 1.28 (0.99-1.67)</p> <p>HR = 1.10 (0.74-1.65)</p> <p>HR = 0.58 (0.21-1.59)</p>                                                                                                                                                                    |
| Heyman et al. 2011 | Structural | <p>Physical health</p> <p>Health service utilisation</p> <p>Quality of life</p> <p>Non-health outcomes</p> | <p>Overall reported health status</p> <p>Scores on a symptom check list</p> <p>Improvements in specific conditions</p> <p>Frequency of health service usage</p> <p>SF36 overall or subscale scores, quality of life</p> <p>Social functioning subscale of the SF36</p> <p>Fuel efficiency, SAP rating</p> <p>Room temperatures, living room PM</p> <p>Estimated fuel expenditure</p> <p>Difference from required fuel expenditure</p> <p>Correlation between year 3 SAP ratings, fuel expenditure, and room temperatures</p> <p>Satisfaction with home warmth, years 2 and 3</p> | <p>Not reported</p> <p>Not reported</p> <p>Not reported</p> <p>Not reported</p> <p>Not reported</p> <p>r=.23, N=83, p=.03</p> <p>Mean = 56.1 (11.6)</p> <p>t = 2.19, p=0.03</p> <p>z = 0.827</p> <p>z = 2.031</p> <p>r=0.37, N=94, P&lt;.0001</p> <p>Wilcoxon W=6147, N=172, P=.02</p> |
| Liddell et al 2011 | Structural | <p>Mortality</p> <p>Cost analysis</p>                                                                      | <p>Estimated deaths prevented by all home safety checks (fire safety, smoke detector, carbon monoxide)</p> <p>Estimated injuries prevented by all home safety checks (fire safety, smoke detector, carbon monoxide)</p> <p>Estimated savings, improved impact on mental well-being (Loft insulation)</p>                                                                                                                                                                                                                                                                         | <p>0.81</p> <p>22.11</p> <p>Reduced by 20% = 1,811 fewer, 1 QALY per 238 people = 7.61 QALY, Estimated saving £1,141,500</p>                                                                                                                                                           |

|                  |            |                                                                                        |                                                                                                                                                                                                                                                                                                                                                                                                                                      |                                                                                                                                                                                                                                                                                                                                                                                                                                                                                                                                                     |
|------------------|------------|----------------------------------------------------------------------------------------|--------------------------------------------------------------------------------------------------------------------------------------------------------------------------------------------------------------------------------------------------------------------------------------------------------------------------------------------------------------------------------------------------------------------------------------|-----------------------------------------------------------------------------------------------------------------------------------------------------------------------------------------------------------------------------------------------------------------------------------------------------------------------------------------------------------------------------------------------------------------------------------------------------------------------------------------------------------------------------------------------------|
|                  |            |                                                                                        | <p>Estimated savings, improved impact on mental well-being (Cavity wall insulation)</p> <p>Estimated savings, physical injury and deaths on ALL home safety checks</p> <p>Improved mental well-being and physical health, central heating via local funding</p> <p>Improved mental well-being and physical health, central heating via local Warm Front Funding</p> <p>Total Mental well-being, physical health, and lives saved</p> | <p>Reduced by 40% = 1,808 fewer, 1 QALY per 238 people = 7.60 QALY, Estimated saving £1,140,000</p> <p>£1,150,200 estimated saving on fatalities prevented, £150,300 estimated savings on injuries prevented</p> <p>Estimated savings of £758,520</p> <p>Estimated savings of £512,820</p> <p>Estimated savings of £4,853,340</p>                                                                                                                                                                                                                   |
| Osman et al 2010 | Structural | <p>Non-health outcomes</p><br><p>Health service utilisation</p> <p>Quality of life</p> | <p>National Home Energy Rating (NHER)</p> <p>Estimated Annual Fuel Costs (EAFC)</p> <p>Living room 21c</p> <p>Bedroom 18c</p> <p>Living room average humidity</p> <p>Bedroom average humidity</p> <p>COPD admissions N</p> <p>Symptom score from SGRQ</p> <p>Impact score from SGRQ</p> <p>Activities score from SGRQ</p> <p>SGRQ total score</p> <p>VAS Score</p>                                                                   | <p><math>\beta = 0.2 (-0.1-0.6)</math></p> <p><math>\beta = -12.1 (-52.4-28.7)</math></p> <p><math>\beta = 7.4 (-11.0-25.8)</math></p> <p><math>\beta = 22.4 (1.6-43.4)</math></p> <p><math>\beta = -1.7 (-4.9-1.6)</math></p> <p><math>\beta = -0.8 (-3.5-1.9)</math></p> <p><math>\beta = 0.4 (-0.4-1.1)</math></p> <p><math>\beta = -3.5 (-11.3-4.3)</math></p> <p><math>\beta = -3.0 (-4.3-10.2)</math></p> <p><math>\beta = -1.4 (-7.7-4.8)</math></p> <p><math>\beta = -0.9 (-6.7-4.9)</math></p> <p><math>\beta = -0.3 (-1.2-0.6)</math></p> |
| Page et al 2022  | Structural | <p>Quality of life</p><br><p>Cost analysis</p>                                         | <p>SF-36: Mental component Summary (MCS)</p> <p>SF-36: Physical component Summary (PCS)</p> <p>EQ-5D-5L</p> <p>Adult Social Care Outcomes Toolkit (ASCOT)</p> <p>QALY gain</p> <p>Medicare Benefits Scheme (MBS) services used over winter</p>                                                                                                                                                                                       | <p><math>\beta = 1.73 (0.21-3.25), p=0.026</math></p> <p><math>\beta = 0.81 (-0.30-1.92)</math></p> <p><math>\beta = 0.01 (-0.03-0.04)</math></p> <p><math>\beta = 0.024 (0.006-0.042), p=0.009</math></p> <p><math>t = 0.45, \text{mean QALY gain is } 0.01 (0.08)</math></p> <p><math>\beta = -0.10 (-0.21-0.01)</math></p>                                                                                                                                                                                                                       |

|                     |            |                            |                                                                                                                                                                                                                                                                                  |                                                                                                                                                                                                                                               |
|---------------------|------------|----------------------------|----------------------------------------------------------------------------------------------------------------------------------------------------------------------------------------------------------------------------------------------------------------------------------|-----------------------------------------------------------------------------------------------------------------------------------------------------------------------------------------------------------------------------------------------|
|                     |            | Health service utilisation | GP services used over winter<br>MBS charges over winter<br>MBS benefits paid over winter<br>MBS out-of-pocket costs<br>Pharmaceutical Benefits Scheme services, all medicines available to be dispensed to patients at a government-subsidised price                             | $\beta = 0.02 (0.11-0.14)$<br>$\beta = -157 (-311-2), p=0.046$<br>$\beta = -108 (-230-14)$<br>$\beta = -49 (-98-0), p=0.051$<br>$\beta = -0.02 (-0.06-0.09)$                                                                                  |
|                     |            | Mortality                  | Number of hospitalisations over winter<br>Hospital admission costs over winter<br>Hospital length of stay over winter<br>Number of ED visits over winter<br>Number of healthcare services used over winter<br>Number of deaths over winter<br>Total healthcare costs over winter | $\beta = -0.17 (-0.57-0.23)$<br>$\beta = -557 (-1417-302)$<br>$\beta = 0.12 (-0.33-0.58)$<br>$\beta = 0.03 (-0.31-0.36)$<br>$\beta = -1.29 (-3.67-1.08)$<br>$\beta = -0.87 (-1.97-0.23)$<br>$\beta = \text{£ } -887 (-106-879), p=0.08$       |
|                     |            | Cost analysis              | Total VHHP Costs (Costs-Cost savings)<br>Cost effectiveness analysis, mean temperature and costs<br>Incremental cost-effectiveness ratio (ICER)<br>Cost benefit analysis, cost savings                                                                                           | \$4684<br>Mean effect = 0.32, p = 0.026; Cost = \$4810<br>\$15,232<br>Year 7 net costs = - \$-271                                                                                                                                             |
|                     |            | Non-health outcomes        | Winter temperature, indoor<br>Morning temperature, indoor<br>Cold exposure<br>Subjective thermal comfort<br>Mould reported in households<br>Damp or musty smell<br>Condensation                                                                                                  | $\beta = 0.33 (0.05-0.60), p=0.022$<br>$\beta = 0.47 (0.10-0.84), p=0.012$<br>$\beta = -43 (-88-2), p=0.012$<br>$\beta = 2.3 (1.8-3.0), p<0.001$<br>OR = 1.07 (0.79-1.45)<br>OR = 1.37 (0.99-1.89), p=0.061<br>OR = 1.48 (1.12-1.95), p=0.006 |
| Peralta et al. 2017 | Structural | Mortality                  | Associations between extreme cold temperatures and mortality from natural causes, all<br>Associations between extreme cold temperatures and mortality from natural causes, men<br>Associations between extreme cold temperatures and mortality from natural causes, women        | RR = 1.95 (1.15-3.33) Lag 15-17<br>RR = 2.23 (1.14-4.36) Lag 15-17<br>RR = 0.46 (0.21-1.01) Lag 0-2                                                                                                                                           |



|                       |             |                                                                               |                                                                                                                                                                                                                                                                                                                                                                                                                                                                                                                                                                                                                                                                                                                                 |                                                                                                                                                                                                                                                                                                           |
|-----------------------|-------------|-------------------------------------------------------------------------------|---------------------------------------------------------------------------------------------------------------------------------------------------------------------------------------------------------------------------------------------------------------------------------------------------------------------------------------------------------------------------------------------------------------------------------------------------------------------------------------------------------------------------------------------------------------------------------------------------------------------------------------------------------------------------------------------------------------------------------|-----------------------------------------------------------------------------------------------------------------------------------------------------------------------------------------------------------------------------------------------------------------------------------------------------------|
|                       |             |                                                                               | <p>Associations between extreme cold temperatures and mortality from respiratory and circulatory diseases, men</p> <p>Associations between extreme cold temperatures and mortality from respiratory and circulatory diseases, women</p> <p>Associations between extreme cold and mortality, circulatory diseases, men</p> <p>Associations between extreme cold and mortality, respiratory diseases, men</p> <p>Associations between extreme cold and mortality, men aged 75+</p> <p>Associations between extreme cold and mortality, circulatory diseases, women</p> <p>Associations between extreme cold and mortality, respiratory diseases, women</p> <p>Associations between extreme cold and mortality, women aged 75+</p> | <p>RR = 2.80 (1.23-6.34) Lag 15-17</p> <p>RR = 0.27 (0.11-0.67) Lag 0-2</p> <p>RR = 3.02 (0.70-12.98)</p> <p>RR = 6.01 (1.10-32.85) Lag 15-17</p> <p>RR = 4.18 (1.22-14.31) Lag 15-17</p> <p>RR = 0.10 (0.03-0.39) Lag 0-2</p> <p>RR = 0.78 (0.03-19.52) Lag 0-2</p> <p>RR = 0.53 (0.20-1.39) Lag 0-2</p> |
| Pollard et al. 2019   | Behavioural | <p>Quality of life</p> <p>Health service utilisation</p> <p>Mental health</p> | <p>Changes in physical health and well-being</p> <p>Use of GP for any respiratory, cardiovascular, circulatory, mental health conditions, or cold/flu</p> <p>Use of hospital for any respiratory, cardiovascular, circulatory, mental health conditions, or cold/flu</p> <p>Use of A&amp;E for any respiratory, cardiovascular, circulatory, mental health conditions, or cold/flu</p> <p>Use of NHS services, such as pharmacist, medicines, GP home visits, etc.</p> <p>Wellbeing, awareness of temperature of the house</p> <p>Wellbeing, feeling vulnerable during winter</p> <p>Wellbeing, feeling cold during winter</p> <p>Wellbeing, feeling poorly during winter compared to last year</p>                             | <p>Not reported, p&gt;0.05</p> <p>Not reported, p=0.016</p> <p>Not reported</p> <p>Not reported, p&lt;0.001</p> <p>Not reported, p=0.001</p> <p>Not reported, p=0.016</p> <p>Not reported, p=0.071</p> <p>Not reported</p> <p>Not reported</p>                                                            |
| Poortinga et al. 2017 | Structural  | Non-health outcomes                                                           | Associations of the intervention measures with the housing suitability                                                                                                                                                                                                                                                                                                                                                                                                                                                                                                                                                                                                                                                          | OR = 1.14 (1.09-1.19)                                                                                                                                                                                                                                                                                     |

|  |                 |                                                                                           |                                                                                                                                                   |
|--|-----------------|-------------------------------------------------------------------------------------------|---------------------------------------------------------------------------------------------------------------------------------------------------|
|  |                 | Associations of the intervention measures with satisfaction in property's state of repair | $\beta = 0.104 (0.008), p < 0.001$                                                                                                                |
|  |                 | Associations of the intervention measures with reporting any building problems            | OR = 0.90 (0.87-0.93)                                                                                                                             |
|  |                 | Associations of total spend and housing suitability                                       | OR = 1.03 (1.02-1.05)                                                                                                                             |
|  |                 | Associations of total spend with satisfaction in property's state of repair               | $\beta = 0.028 (0.002), p < 0.001$                                                                                                                |
|  |                 | Associations of total spend with reporting any building problems                          | OR = 0.97 (0.96-0.98)                                                                                                                             |
|  |                 | Associations of the intervention measures with thermal comfort and household finances     | Thermal comfort $\beta = -0.015 (0.033)$ ; Costs of living in home $\beta = 0.025 (0.033)$ ; Difficulties in paying bills $\beta = 0.007 (0.066)$ |
|  |                 | Associations of each additional intervention measure with the thermal comfort             | $\beta = 0.090 (0.008), \beta = 0.024 (0.002), p < 0.001$                                                                                         |
|  |                 | Associations of each additional intervention measure with better household finances       | Costs of living in home $\beta = -0.072 (0.008), p < 0.001$ ; Difficulties in paying bills OR = 0.96 (0.93-0.99)                                  |
|  |                 | Associations of total spend with better household finances                                | Costs of living in home $\beta = -0.017 (0.002), p < 0.001$ ; Difficulties in paying bills OR = 0.99 (0.98-1.00)                                  |
|  | Physical health | Association of cavity wall insulation with general health                                 | OR = 0.78 (0.68-0.89)                                                                                                                             |
|  | Physical health | Association of cavity wall insulation with respiratory symptoms                           | OR = 1.47 (1.30-1.66)                                                                                                                             |
|  | Physical health | Association of windows and doors with good health                                         | $\beta = -0.15 (0.099)$                                                                                                                           |
|  | Physical health | Association of boilers with respiratory symptoms                                          | $\beta = -0.008 (0.057)$                                                                                                                          |
|  | Physical health | Association of total spend with respiratory symptoms                                      | OR = 0.99 (0.98-1.00)                                                                                                                             |
|  | Physical health | Association of each additional intervention measure with physical health                  | OR = 1.03 (1.00-1.07)                                                                                                                             |
|  | Mental health   | Association of total spend with physical health                                           | OR = 1.01 (1.00-1.02)                                                                                                                             |
|  | Mental health   | Association of cavity wall insulation with mental health                                  | $\beta = -2.052 (0.687), p < 0.05$                                                                                                                |
|  | Mental health   | Association of each additional intervention measure with mental health                    | $\beta = 0.0826 (0.161), p < 0.001$                                                                                                               |
|  | Mental health   | Association of total spend with mental health                                             | $\beta = 0.223 (0.044), p < 0.001$                                                                                                                |

|                        |            |                                                                                               |                                                                                                                                                                                                                                                                                                                                                                                                                                                                                                                                                                                                                             |                                                                                                                                                                                                                                                                                                                                                                                                                                                                                                                                    |
|------------------------|------------|-----------------------------------------------------------------------------------------------|-----------------------------------------------------------------------------------------------------------------------------------------------------------------------------------------------------------------------------------------------------------------------------------------------------------------------------------------------------------------------------------------------------------------------------------------------------------------------------------------------------------------------------------------------------------------------------------------------------------------------------|------------------------------------------------------------------------------------------------------------------------------------------------------------------------------------------------------------------------------------------------------------------------------------------------------------------------------------------------------------------------------------------------------------------------------------------------------------------------------------------------------------------------------------|
| Poortinga et al. 2018a | Structural | Health service utilisation                                                                    | <p>Change in cardiorespiratory emergency admissions for people of all ages</p> <p>Change in COPD emergency admissions for people of all ages</p> <p>Change in cardiovascular-related emergency admissions for people of all ages</p> <p>Change in respiratory-related admissions for people of all ages</p> <p>Change in cardiorespiratory emergency admissions for people aged &gt; 60</p> <p>Change in COPD emergency admissions for people aged &gt; 60</p> <p>Change in cardiovascular-related emergency admissions for people aged &gt; 60</p> <p>Change in respiratory-related admissions for people aged &gt; 60</p> | <p><math>\Delta = 0.0011</math> (-0.0103-0.0125)</p> <p><math>\Delta = -0.0002</math> (-0.0025-0.0022)</p> <p><math>\Delta = -0.0014</math> (-0.0083-0.0055)</p> <p><math>\Delta = 0.0042</math> (-0.0046-0.0131)</p> <p><math>\Delta = 0.0490</math> (-0.0153-0.1132)</p> <p><math>\Delta = 0.0133</math> (-0.0030-0.0295)</p> <p><math>\Delta = 0.0273</math> (0.0068-0.0479), <math>p=0.009</math></p> <p><math>\Delta = 0.0412</math> (-0.0141-0.0964)</p>                                                                     |
| Poortinga et al. 2018b | Structural | <p>Physical health</p> <p>Quality of life</p> <p>Mental health</p> <p>Non-health outcomes</p> | <p>Self-reported respiratory symptoms</p> <p>Self-reported asthma symptoms</p> <p>Mental health composite score of the SF-12 (MCS)</p> <p>Physical health composite score of the SF-12 (PCS)</p> <p>Health-related quality of life SF-6D and QALY</p> <p>Subjective wellbeing</p> <p>Putting up with feeling cold to save costs</p> <p>Financial difficulties</p> <p>Thermal satisfaction</p> <p>Satisfaction of the state of repair of the home</p> <p>The number of housing problems</p> <p>Social interactions</p>                                                                                                       | <p><math>\beta = -0.141</math> (0.202)</p> <p><math>\beta = -0.133</math> (0.253)</p> <p><math>\beta = -0.003</math> (0.812)</p> <p><math>\beta = 0.976</math> (0.669)</p> <p><math>\beta = -0.007</math>, SE (0.016) (-0.04-0.02)</p> <p><math>\beta = 0.384</math> (0.134)</p> <p>OR = 0.49(0.25-0.94)</p> <p><math>\beta = -0.15</math> (-0.25--0.05)</p> <p><math>\beta = 1.34</math> (0.91-1.77)</p> <p><math>\beta = 1.35</math> (0.92-1.79)</p> <p><math>\beta = -1.10</math> (-1.54-0.66)</p> <p>OR = 0.32 (0.13-0.77)</p> |
| Poortinga et al. 2018c | Structural | Cost analysis                                                                                 | <p>Costs and consequences for hospital admissions for cardiovascular and respiratory conditions</p> <p>Costs and consequences for hospital admissions for COPD</p>                                                                                                                                                                                                                                                                                                                                                                                                                                                          | <p>0.0041 events per person, per-person cost £345.75, intervention cost £334.44, increase in treatment costs of £11.31</p> <p>-0.0006 events reduction per person, reduction in NHS treatment costs of £1.64</p>                                                                                                                                                                                                                                                                                                                   |

|                    |            |                            |                                                                                                                                                                                                                                                                                                                                                                                                                                                                                                                                                                                                                                                                                              |                                                                                                                                                                                                                                                                                     |
|--------------------|------------|----------------------------|----------------------------------------------------------------------------------------------------------------------------------------------------------------------------------------------------------------------------------------------------------------------------------------------------------------------------------------------------------------------------------------------------------------------------------------------------------------------------------------------------------------------------------------------------------------------------------------------------------------------------------------------------------------------------------------------|-------------------------------------------------------------------------------------------------------------------------------------------------------------------------------------------------------------------------------------------------------------------------------------|
|                    |            |                            | <p>Costs and consequences for hospital admissions for cardiovascular-related</p> <p>Costs and consequences for hospital admissions for respiratory-related</p> <p>Within-year QALY decrease for a single COPD exacerbation hospital admission</p>                                                                                                                                                                                                                                                                                                                                                                                                                                            | <p>-0.0053 events per person, discounted amount saved is £14.56</p> <p>0.016 events per person, net cost £248.48</p> <p>0.022, ICER is &gt; £10M (£10,485,472.12) per QALY gained</p>                                                                                               |
| Preval et al 2017  | Structural | Health service utilisation | <p>Health risk, insulation intervention for circulatory-related hospital admissions</p> <p>Health risk, insulation intervention for respiratory-related hospital admissions</p> <p>Health risk, heating intervention for circulatory-related hospital admissions</p> <p>Health risk, heating intervention for respiratory-related hospital admissions</p> <p>Health risk, insulation and heating intervention for circulatory-related hospital admissions</p> <p>Health risk, insulation and heating intervention for respiratory-related hospital admissions</p>                                                                                                                            | <p>HR = 0.673 (0.535-0.847), p=0.001</p> <p>HR = 0.83 (0.655-1.051)</p> <p>HR = 1.348 (0.881-2.064)</p> <p>HR = 1.129 (0.656-1.944)</p> <p>HR = 0.581 (0.350-0.964)</p> <p>HR = 0.624 (0.324-1.200)</p>                                                                             |
| Rodgers et al 2018 | Structural | Health service utilisation | <p>Windows and doors, emergency hospital admissions, 60 years and over, exposure 1</p> <p>Wall insulation, emergency hospital admissions, 60 years and over, exposure 1</p> <p>Loft insulation, emergency hospital admissions, 60 years and over, exposure 1</p> <p>Heating systems, emergency hospital admissions, 60 years and over, exposure 1</p> <p>Kitchens, emergency hospital admissions, 60 years and over, exposure 1</p> <p>Bathrooms, emergency hospital admissions, 60 years and over, exposure 1</p> <p>Electrical systems, emergency hospital admissions, 60 years and over, exposure 1</p> <p>Garden paths, emergency hospital admissions, 60 years and over, exposure 1</p> | <p>IRR = 0.71 (0.63-0.81), p=0.000</p> <p>IRR = 0.75 (0.67-0.84), p=0.000</p> <p>IRR = 0.98 (0.86-1.11)</p> <p>IRR = 0.91 (0.82-1.01)</p> <p>IRR = 0.98 (0.83-1.17)</p> <p>IRR = 0.93 (0.81-1.06)</p> <p>IRR = 0.61 (0.53-0.72), p=0.000</p> <p>IRR = 0.61 (0.64-0.83), p=0.000</p> |

|                   |             |                 |                                                                                                 |                                         |
|-------------------|-------------|-----------------|-------------------------------------------------------------------------------------------------|-----------------------------------------|
|                   |             |                 | Windows and doors, cardiovascular emergency hospital admissions, 60 years and over, exposure 1  | IRR = 0.81 (0.69-0.96)                  |
|                   |             |                 | Wall insulation, cardiovascular emergency hospital admissions, 60 years and over, exposure 1    | IRR = 0.73 (0.63-0.85), p=0.000         |
|                   |             |                 | Loft insulation, cardiovascular emergency hospital admissions, 60 years and over, exposure 1    | IRR = 0.86 (0.73-1.02), p=0.0835        |
|                   |             |                 | Heating systems, cardiovascular emergency hospital admissions, 60 years and over, exposure 1    | IRR = 0.94 (0.82-1.08)                  |
|                   |             |                 | Kitchens, cardiovascular emergency hospital admissions, 60 years and over, exposure 1           | IRR = 0.91 (0.73-1.13)                  |
|                   |             |                 | Bathrooms, cardiovascular emergency hospital admissions, 60 years and over, exposure 1          | IRR = 0.94 (0.78-1.13)                  |
|                   |             |                 | Electrical systems, cardiovascular emergency hospital admissions, 60 years and over, exposure 1 | IRR = 0.80 (0.66-0.99), p=0.0364        |
|                   |             |                 | Garden paths, cardiovascular emergency hospital admissions, 60 years and over, exposure 1       | IRR = 0.84 (0.70-1.00)                  |
|                   |             |                 | Windows and doors, respiratory emergency hospital admissions, 60 years and over, exposure 1     | IRR = 0.61 (0.49-0.76), p=0.000         |
|                   |             |                 | Wall insulation, respiratory emergency hospital admissions, 60 years and over, exposure 1       | IRR = 0.76 (0.62-0.92), p=0.0055        |
|                   |             |                 | Loft insulation, respiratory emergency hospital admissions, 60 years and over, exposure 1       | IRR = 1.18 (0.95-1.48)                  |
|                   |             |                 | Heating systems, respiratory emergency hospital admissions, 60 years and over, exposure 1       | IRR = 0.85 (0.71-1.03)                  |
|                   |             |                 | Kitchens, respiratory emergency hospital admissions, 60 years and over, exposure 1              | IRR = 1.17 (0.86-1.59)                  |
|                   |             |                 | Bathrooms, respiratory emergency hospital admissions, 60 years and over, exposure 1             | IRR = 0.89 (0.70-1.13)                  |
|                   |             |                 | Electrical systems, respiratory emergency hospital admissions, 60 years and over, exposure 1    | IRR = 0.43 (0.33-0.57), p=0.000         |
|                   |             |                 | Garden paths, respiratory emergency hospital admissions, 60 years and over, exposure 1          | IRR = 0.62 (0.49-0.78), p=0.000         |
| Saeki et al. 2015 | Behavioural | Physical health | Sleep-trough morning BP surge, SBP (mmHg)                                                       | $\beta = -4.43 (-7.88--0.97)$ , p=0.012 |
|                   |             |                 | Prewaking MBPS, DBP (mmHg)                                                                      | $\beta = -2.33 (-0.08--4.58)$ , p=0.042 |

|                           |            |                     |                                                                                                                                                                                                                                                                                                                                                                                                                                                 |                                                                                                                                                                                                                                                                                                                                       |
|---------------------------|------------|---------------------|-------------------------------------------------------------------------------------------------------------------------------------------------------------------------------------------------------------------------------------------------------------------------------------------------------------------------------------------------------------------------------------------------------------------------------------------------|---------------------------------------------------------------------------------------------------------------------------------------------------------------------------------------------------------------------------------------------------------------------------------------------------------------------------------------|
|                           |            | Non-health outcomes | Physical activity (counts/min)<br>Living room temperature (C)                                                                                                                                                                                                                                                                                                                                                                                   | $\beta = -26.10 (-55.52-3.30), p=0.082$<br>$\beta = 2.09 (1.28-2.90), p<0.001$                                                                                                                                                                                                                                                        |
| Telfar-Barnard et al 2011 | Structural | Mortality           | Effect of treatment on mortality rates in people aged 65+ hospitalised prior to treatment month<br>Effect of treatment on mortality rates in people aged 65+ hospitalised with circulatory illness prior to treatment month<br>Effect of treatment on mortality rates in people aged 65+ hospitalised with respiratory illness prior to treatment month                                                                                         | RR = 0.95,(0.80-1.13)<br>RR = 0.73, (0.53-1.00), p=0.048<br>RR = 1.01 (0.73-1.40)                                                                                                                                                                                                                                                     |
|                           |            | Cost analysis       | The value of reduced mortality per dwelling, life years gained<br>The value of reduced mortality per dwelling, CSC and non-CSC<br>Change in monthly hospitalisation costs, insulation<br>Change in monthly hospitalisation costs, heating<br>Change in monthly pharmaceutical costs, insulation<br>Change in monthly pharmaceutical costs, heating<br>On-going annual benefit for retrofitted insulation<br>On-going annual benefit for heating | \$439.95 ( \$0.00, \$765.84)<br>CSC dwelling = \$ 613.05 (\$0.00, \$1,067.16); Non CSC dwelling = \$216.38 \$0.00, \$376.66)<br>$\beta = -\$5.37 (-9.54, -1.21), p<0.01$<br>$\beta = -\$1.37 (-10.05, 7.32)$<br>$\beta = -\$0.92 (-1.57, -0.27), p<0.01$<br>$\beta = -\$0.68 (-2.03, 0.66)$<br>\$563.18 (\$121.23-\$889.07)<br>\$4.64 |
| Tonn et al 2023           | Structural | Mental health       | Thinking about your mental health, which includes stress, depression, and problems with emotions, for how many days during the past 30 days was your mental health not good?                                                                                                                                                                                                                                                                    | $\beta = 1.34$                                                                                                                                                                                                                                                                                                                        |
|                           |            | Physical health     | In the past three months, have you had headaches that are either new or more frequent or severe than ones you've had before? Y/N<br>How many days per week do you do moderate physical activities for at least 30 min?<br>How many days per week do you do vigorous physical activities for at least 20 min?<br>Had arthritis symptoms – past 3 months                                                                                          | $\beta = -6.4, p<0.001$<br>$\beta = 0.15$<br>$\beta = 0.01$<br>$\beta = -0.09, p<0.10$                                                                                                                                                                                                                                                |

|  |  |                            |                                                                                                                                                                                                                                                                                                                                                                                                                                                                                                                                                                                                                                                                                                                                                                                                                                                                                                                                                                   |                                                                                                                                                                                                                                                                                                                                                                                               |
|--|--|----------------------------|-------------------------------------------------------------------------------------------------------------------------------------------------------------------------------------------------------------------------------------------------------------------------------------------------------------------------------------------------------------------------------------------------------------------------------------------------------------------------------------------------------------------------------------------------------------------------------------------------------------------------------------------------------------------------------------------------------------------------------------------------------------------------------------------------------------------------------------------------------------------------------------------------------------------------------------------------------------------|-----------------------------------------------------------------------------------------------------------------------------------------------------------------------------------------------------------------------------------------------------------------------------------------------------------------------------------------------------------------------------------------------|
|  |  | Health service utilisation | <p>Visited doctor for arthritis last 12 months</p> <p>Stay overnight in the hospital because apartment was too cold</p> <p>Go to emergency at hospital because apartment was too cold</p> <p>Visit a doctor because apartment was too cold</p> <p>Urgent care for treatment of worsening arthritis symptoms - last 12 months</p> <p>Visited emergency department because of arthritis – last 12 months</p> <p>Stay overnight in hospital because of arthritis – last 12 months</p> <p>Other than a routine visit, have you had to see a doctor in the past 12 months for symptoms related to shortness of breath, bronchitis, or other COPD, or emphysema flare ups?</p> <p>Did you have to visit an emergency room or be admitted to a hospital in the past 12 months because of your COPD, chronic bronchitis, or emphysema?</p> <p>How many different medications do you currently take each day to help with your COPD, chronic bronchitis, or emphysema?</p> | <p><math>\beta = -0.094</math></p> <p><math>\beta = -0.006</math></p> <p><math>\beta = -0.016, p&lt;0.05</math></p> <p><math>\beta = -0.031, p&lt;0.01</math></p> <p><math>\beta = -0.024</math></p> <p><math>\beta = -0.043</math></p> <p><math>\beta = -0.026</math></p> <p><math>\beta = 0.326, p&lt;0.05</math></p> <p><math>\beta = -0.049</math></p> <p><math>\beta = -0.042</math></p> |
|--|--|----------------------------|-------------------------------------------------------------------------------------------------------------------------------------------------------------------------------------------------------------------------------------------------------------------------------------------------------------------------------------------------------------------------------------------------------------------------------------------------------------------------------------------------------------------------------------------------------------------------------------------------------------------------------------------------------------------------------------------------------------------------------------------------------------------------------------------------------------------------------------------------------------------------------------------------------------------------------------------------------------------|-----------------------------------------------------------------------------------------------------------------------------------------------------------------------------------------------------------------------------------------------------------------------------------------------------------------------------------------------------------------------------------------------|
